# Supplementary material for: Mesoporous silica nanoparticles engineered for ultrasound-induced uptake by cancer cells
Source: Royal Society of Chemistry journal article supplement (doi:10.1039/c8nr00693h), 2018-01-01
Supplement: c8nr00693h1.pdf [file c8nr00693h1.pdf]

## Supporting Information

### Mesoporous Silica Nanoparticles Engineered for Ultrasound-Induced Uptake by Cancer Cells

Juan L. Paris<sup>a,b</sup>, Miguel Manzano<sup>a,b</sup>, M. Victoria Cabañas<sup>a</sup> and María Vallet-Regí<sup>a,b,\*</sup>

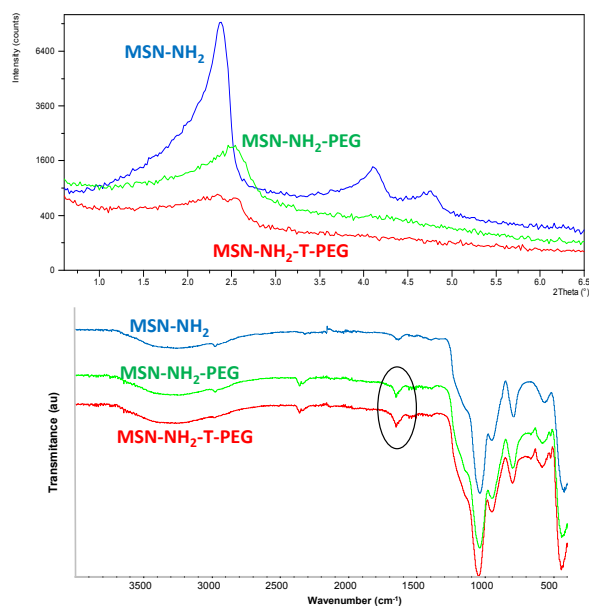

**Figure S1.** Characterization of MSN-NH<sub>2</sub>, MSN-NH<sub>2</sub>-PEG and MSN-NH<sub>2</sub>-T-PEG. Small angle XRD patterns (top) and FTIR spectra (bottom).
